# Supplementary material
Source: PubMed Central journal article supplement (PMC2734472)
Supplement: NIHMS128069-supplement-01.pdf [file NIHMS128069-supplement-01.pdf]

Supplement 2

Figure S1. Timeline of behavior and weight data.

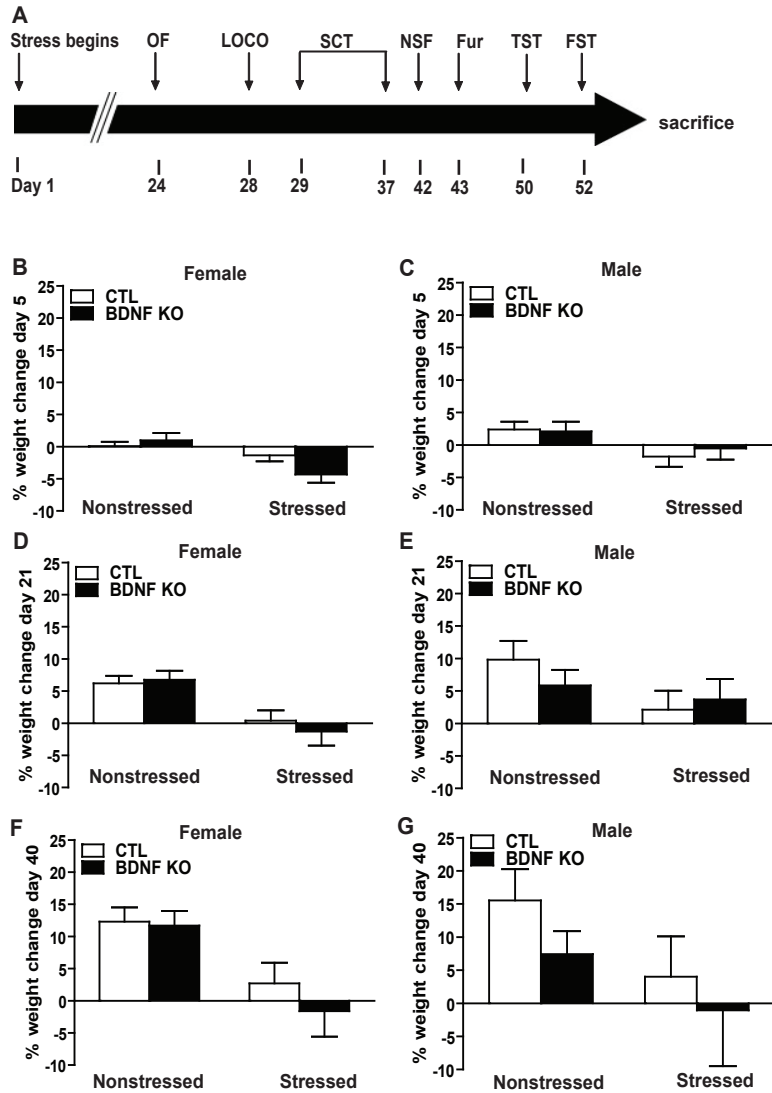

(A) The CUS paradigm was performed over 52 days with the behavioral tests conducted on the days indicated on the timeline (abbreviations listed in methods section). Ten to fifteen minutes after forced swim test on day 52, mice were rapidly decapitated and trunk blood was collected for CORT assay. (B, D, F) In females, there were significant main effect of stress ( $F_{1,11} = 36.42$ ,  $p < 0.0001$ ), however, there was no significant effect of genotype ( $p > 0.05$ ) nor an interaction between stress and genotype ( $p > 0.05$ ). (C, E, G) In males, there was a significant main effect of stress ( $F_{1,8} = 9.96$ ,  $p < 0.05$ ) but no significant effect of genotype ( $p > 0.05$ ) nor an interaction between stress and genotype ( $p > 0.05$ ).
