# Supplementary material
Source: PubMed Central journal article supplement (PMC2734472)
Supplement: NIHMS128069-supplement-02.pdf [file NIHMS128069-supplement-02.pdf]

Supplement 1

Table S1. Table depicts the number of animals of each sex and genotype used in experiments.

| Behavior        | Females     |    |          |    | Males       |    |          |    |
|-----------------|-------------|----|----------|----|-------------|----|----------|----|
|                 | Nonstressed |    | Stressed |    | Nonstressed |    | Stressed |    |
|                 | CTL         | KO | CTL      | KO | CTL         | KO | CTL      | KO |
| Weight-day 5    | 12          | 11 | 14       | 12 | 12          | 7  | 10       | 8  |
| Weight-day 21   | 12          | 11 | 14       | 12 | 9           | 8  | 10       | 8  |
| Weight-day 40   | 12          | 11 | 14       | 12 | 9           | 8  | 10       | 8  |
| Locomotor       | 12          | 11 | 14       | 11 | 9           | 8  | 10       | 8  |
| Open field      | 12          | 11 | 14       | 12 | 9           | 8  | 10       | 8  |
| Fur test        | 12          | 11 | 14       | 12 | 8           | 7  | 10       | 8  |
| Sucrose test    | 12          | 11 | 14       | 12 | 9           | 8  | 10       | 8  |
| Novelty feeding | 11          | 10 | 14       | 12 | 8           | 7  | 10       | 8  |
| Forced swim     | 12          | 11 | 14       | 12 | 9           | 9  | 9        | 7  |
| Tail suspension | 9           | 7  | 10       | 9  | 8           | 7  | 10       | 8  |
| CORT            | 10          | 10 | 14       | 12 | 9           | 7  | 9        | 8  |
| QPCR            | 10          | 8  | 10       | 10 | 9           | 7  | 9        | 7  |
