# Supplementary material
Source: PubMed Central journal article supplement (PMC2734472)

Supplement 4

Figure S2. Total distance moved in open field arena was unchanged in females and males after CUS.

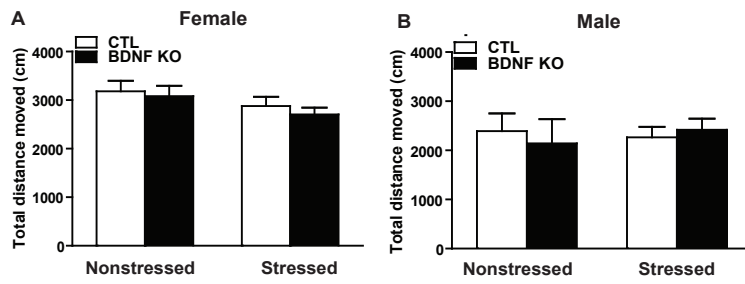

Supplement: NIHMS128069-supplement-04.pdf [file NIHMS128069-supplement-04.pdf]
