# Supplementary material
Source: PubMed Central journal article supplement (PMC2734472)

Supplement 5

Figure S3. Amount of water consumed during sucrose intake testing was not significantly altered by CUS.

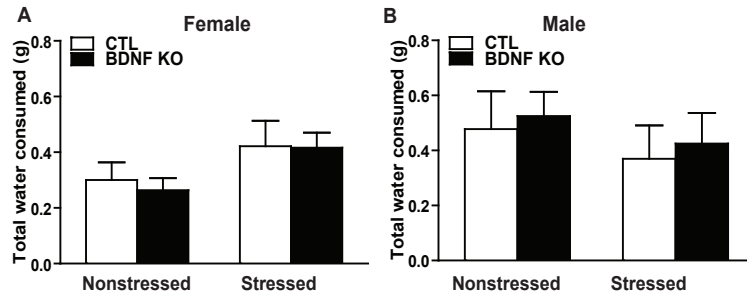

Supplement: NIHMS128069-supplement-05.pdf [file NIHMS128069-supplement-05.pdf]
