# Supplementary material
Source: PubMed Central journal article supplement (PMC2734472)
Supplement: NIHMS128069-supplement-06.pdf [file NIHMS128069-supplement-06.pdf]

Supplement 6

Figure S4. Classic measures of depression are not altered by CUS in males or females.

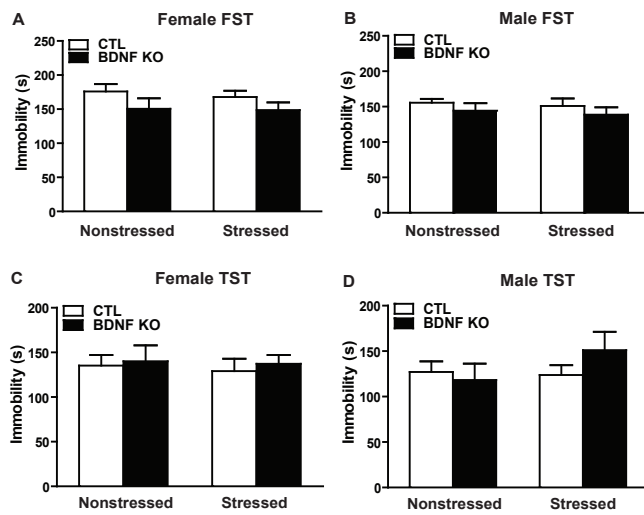

(A-B) There was no significant difference in the immobility time in the forced swim test in male or female mice, CTL or KO, after chronic stress. (C-D) Similarly, we observed no significant differences in the tail suspension test between male or female, stressed and nonstressed, mice regardless of genotype.
